# Supplementary material
Source: HighWire-hosted journal article supplement (https://www.rcpjournals.org/highwire/filestream/9826/field_highwire_adjunct_files/2/Quraishi_Supplementary_S3_eval_form.pdf)

## Supplementary material S3

### Evaluation forms

#### Trainees Evaluation Form

Thank you for contributing to the CiP study. We would appreciate it if you would take ten minutes to complete this evaluation form.

---

Please provide us with your specialty and year of training: \_\_\_\_\_

#### Process

Did you meet with your clinical supervisor(s) for them to complete the Clinical Supervisor Report?

☐ Yes ☐ No

Did you meet with your clinical supervisor(s) for them to complete the report?

☐ Yes ☐ No

If yes – How many clinical supervisors did you meet?

If no – would you have found a meeting with the clinical supervisor useful?

How does the time commitment in completing the CiP documentation compare with the previous system?

☐ More time ☐ About the same ☐ Less time

Please explain your answer:

Do you feel the new CiP process is more or less fair than the previous system? Please explain your answer.

☐ More fair ☐ About the same ☐ Less fair

Please explain your answer:

#### Documentation

Do you feel the CiP descriptors provide your supervisors with enough guidance to make entrustment decisions about your performance?

☐ Yes ☐ No

Please explain your answer:

#### Levels of supervision

What do you feel is the purpose of the levels of supervision?

Is there a clear difference between each level of supervision? Please explain your answer.

Regarding the four levels of supervision which of the following do you agree with? Please explain your answer.

☐ Too many

☐ Current number of levels is correct

☐ Too few levels

### **Decisions**

What evidence do you feel was most useful for informing your CiP entrustment decisions?

What additional evidence would you have liked your supervisor to have access to when making entrustment decision?

Did any of the CiPs prove more difficult to gather evidence for than others? If so, which ones and why?

Do you feel the new CiP system makes it easy to defend decisions you make about your performance? Please explain your answer.

### **Training**

Did you attend the face to face training sessions?

☐ Yes

☐ No

Do you feel that attending a face-to-face training session would have been beneficial to your understanding of the new CiP process?

☐ yes

☐ no

please explain your answer

### **Additional information**

Please add any additional comments you would like to make about the CiP study.

## **Clinical Supervisors Evaluation Form**

Thank you for contributing to the CiP study. We would appreciate it if you would take ten minutes to complete this evaluation form

---

Please provide us with your specialty: \_\_\_\_\_

### **Process**

How does the time commitment in completing the CiP documentation compare with the previous system?

☐ More time

☐ About the same

☐ Less time

Please explain your answer:

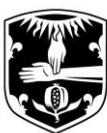

**Do you feel the new CiP process is more or less fair than the previous system? Please explain your answer:**

☐ **More fair**                      ☐ **About the same**                      ☐ **Less fair**

**Did you have the opportunity to meet with your trainee before submitting your Clinical Supervisor Reports?**

☐ **yes**                      ☐ **no**                      If you are not able to meet please comment on why this is

### **Documentation**

**Do the CiP descriptors provide you with enough information to make entrustment decisions? Please explain your answer:**

☐ **yes**                      ☐ **no**

### **Levels of supervision**

**What do you feel is the purpose of the levels of supervision?**

**Is there a clear difference between each level of supervision? Please explain your answer.**

☐ **yes**                      ☐ **no**

**Regarding the four levels of supervision, which of the following do you agree with?**

☐ **Too many levels**                      ☐ **Current number of levels is correct**                      ☐ **Too few levels**

### **Decisions**

**What evidence was most useful for informing your CiP entrustment decisions?**

**Is there any additional evidence would have helped inform your entrustment decision?**

☐ **yes**                      ☐ **no**

**Did any of the CiPs prove more difficult to gather evidence for? If so, which ones?**

**Do you feel the new system makes it easy to defend decisions you make about a trainees performance? Please explain your answer.**

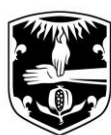

### **Training**

Did you attend any of the face to face training sessions?

☐ yes ☐ no

Do you feel that attending a face-to-face training session would have been beneficial to your understanding of the new CiP process?

☐ yes ☐ no please explain your answer

### **Additional information**

Please add any additional comments you would like to make about the CiP study.

## **Educational Supervisors Evaluation Form**

Thank you for contributing to the CiP study. We would appreciate it if you would take ten minutes to complete this evaluation form.

---

Please provide us with your specialty: \_\_\_\_\_

### **Process**

Did you and your trainee meet and discuss their progress, including self assessment before you completed your educational supervisor form?

☐ yes ☐ no please explain your answer

How does the time commitment in completing the CiP documentation compare with the previous system?

☐ More time ☐ About the same ☐ Less time

Please explain your answer:

Do you feel the new CiP process is more or less fair than the previous system? Please explain your answer.

☐ More fair ☐ About the same ☐ Less fair

### **Documentation**

Do the CiP descriptors provide you with enough guidance to make entrustment decisions about a trainees performance?

☐ yes ☐ no please explain your answer

### **Levels of supervision**

What do you feel is the purpose of the levels of supervision?

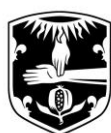

**Is there a clear difference between each level of supervision?** Please explain your answer.

☐ yes ☐ no

**Regarding the four levels of supervision which of the following do you agree with?**

☐ Too many ☐ Current number is correct ☐ Too few levels

### Decisions

**Are you able to make entrustment decisions, in a range of clinical specialties and learning environments, across the entire range of fourteen different 'CiPs' and four different performance levels?** Please explain your answer.

☐ yes ☐ no

**What evidence was most useful for informing your CiP entrustment decisions?**

**Is there any additional evidence would have helped inform your entrustment decision?**

☐ yes ☐ no

**Did any of the CiPs prove more difficult to gather evidence for? If so, which ones?**

**Do you feel the new system makes it easy to defend decisions you make about a trainees performance?** Please explain your answer.

☐ yes ☐ no

### Training

**Did you attend the face to face training sessions?**

☐ yes ☐ no

**Do you feel that attending a face-to-face training session would have been beneficial to your understanding of the new CiP process?**

☐ yes ☐ no please explain your answer

### Additional information

**Please add any additional comments you would like to make about the CiP study.**



Supplement: Quraishi_Supplementary_S3_eval_form.pdf [file Quraishi_Supplementary_S3_eval_form.pdf]
